# Supplementary material for: Long-Term Clinical Outcome of Cardiogenic Shock Patients Undergoing Impella CP Treatment vs. Standard of Care
Source: PubMed Central journal article supplement (PMC7760637; doi:10.3390/jcm9123803), 2020-11-24
Supplement: jcm-09-03803-s001.pdf [file jcm-09-03803-s001.pdf]

Supplementary Materials

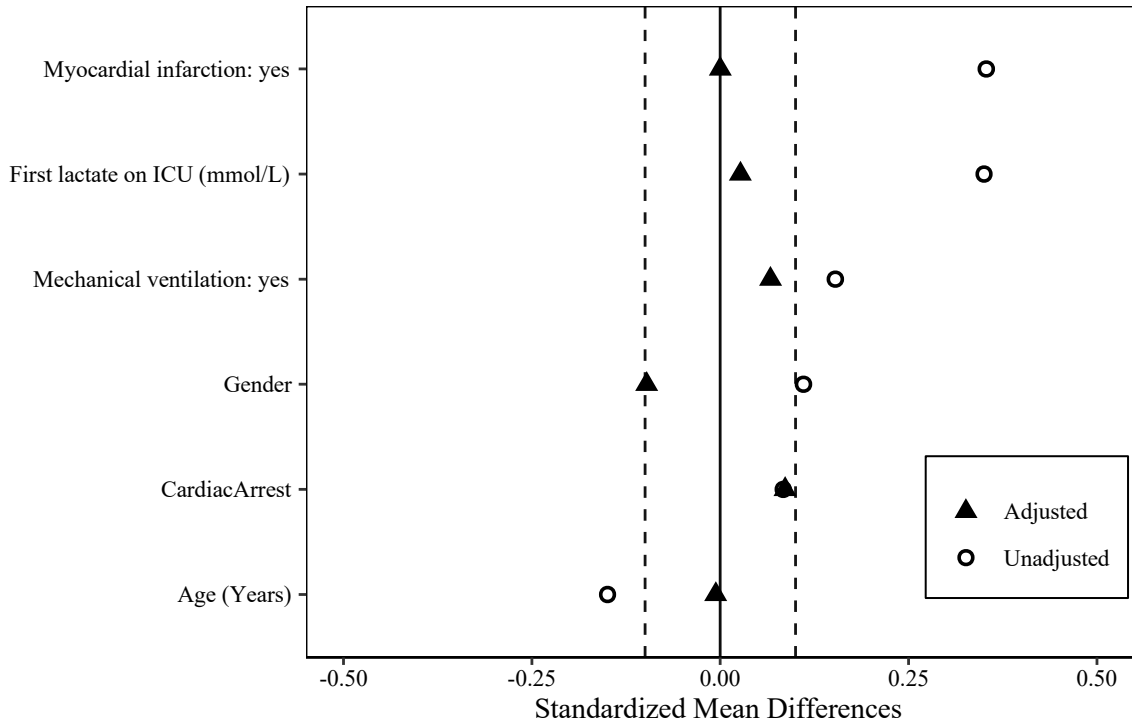

Supplementary Figure S1. Love plot. Love plot showing standardized mean differences of unadjusted parameters before and adjusted parameters after matching.

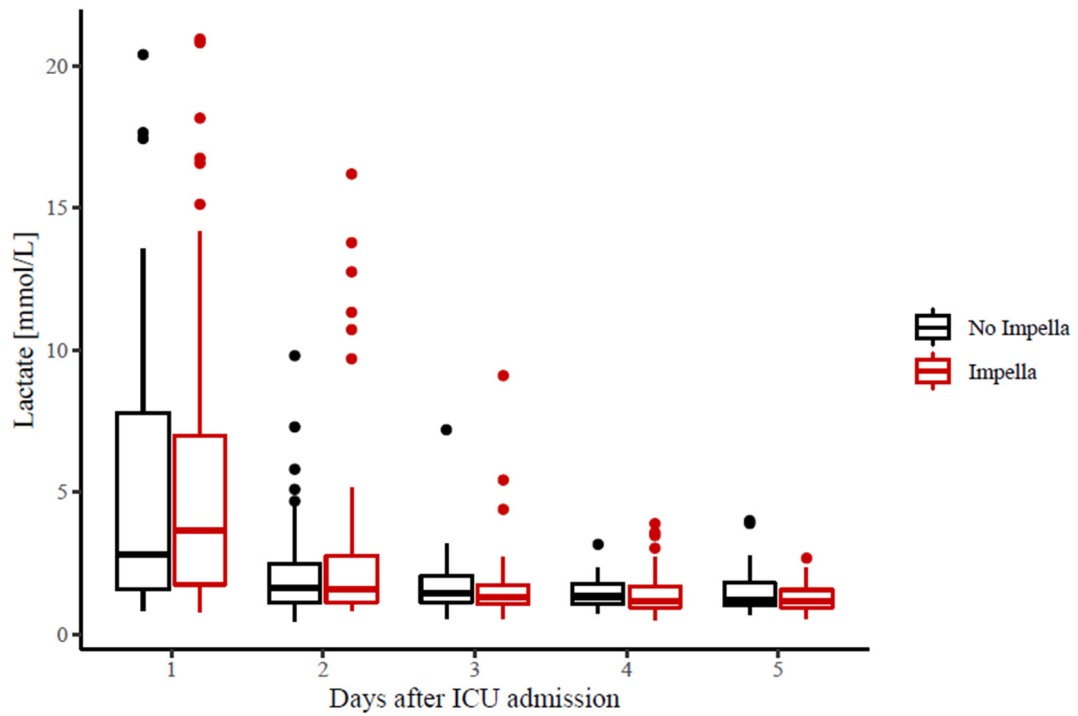

**Supplementary Figure S2.** Lactate levels. Lactate levels after ICU admission in patients treated without cardiocirculatory support versus patients treated with Impella CP (day 1:  $p = 0.57$ , day 2:  $p = 0.91$ , day 3:  $p = 0.26$ , day 4:  $p = 0.36$ , day 5:  $p = 0.47$ ).

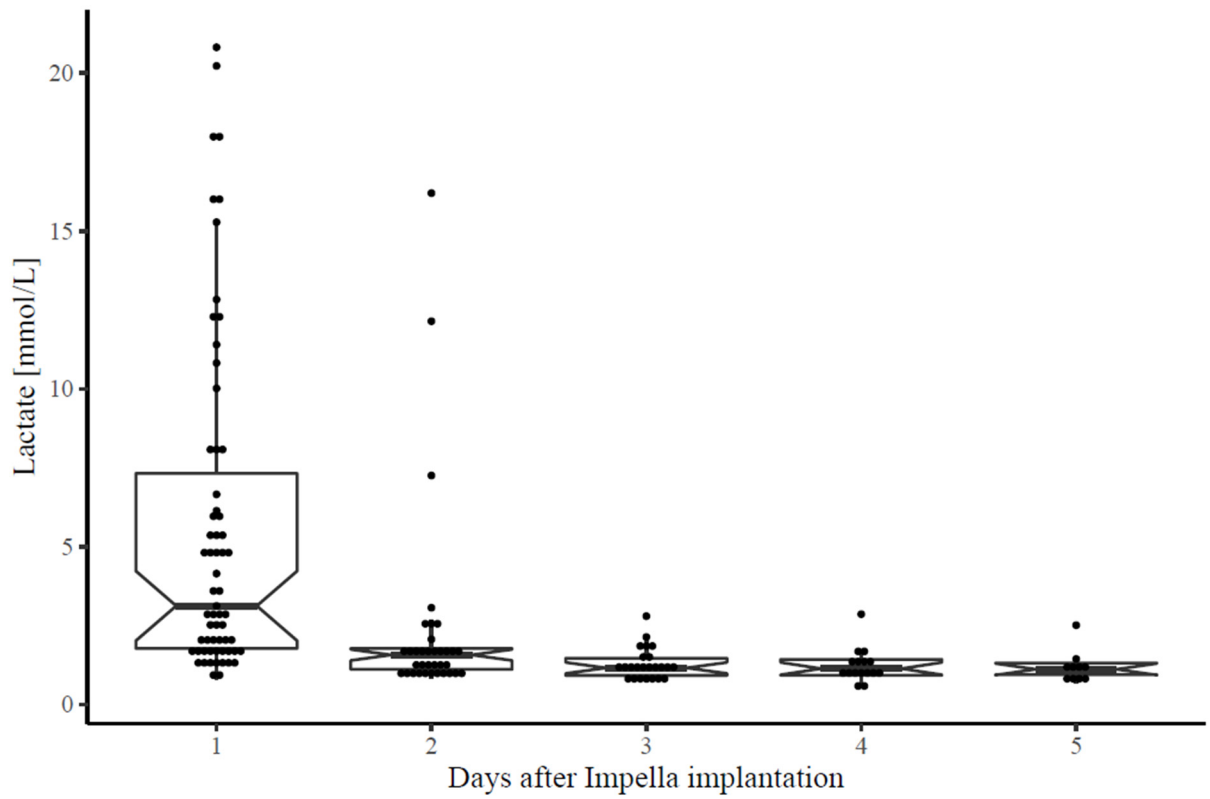

**Supplementary Figure 3.** Lactate levels. Lactate levels in patients treated with Impella CP after implantation.

**Supplementary Table S1.** Patients' characteristics before matching

| Variables                               | Conventional<br>( $n = 319$ ) | Impella<br>( $n = 76$ ) | $p$ value |
|-----------------------------------------|-------------------------------|-------------------------|-----------|
| Age in years, mean (SD)                 | 69.4 (14.2)                   | 67.3 (14.2)             | 0.24      |
| Male gender, $n$ (%)                    | 228 (71.5)                    | 58 (76.3)               | 0.48      |
| Body mass index, mean (SD)              | 27.3 (7.2)                    | 27.3 (4.4)              | 0.94      |
| Coronary artery disease, $n$ (%)        | 200 (62.7)                    | 52 (68.4)               | 0.42      |
| Previous myocardial infarction, $n$ (%) | 91 (28.5)                     | 19 (25.0)               | 0.64      |
| Previous PCI, $n$ (%)                   | 97 (30.4)                     | 27 (35.5)               | 0.47      |
| Previous CABG, $n$ (%)                  | 16 (5.0)                      | 2 (2.6)                 | 0.56      |
| Atrial fibrillation, $n$ (%)            | 129 (40.4)                    | 22 (28.9)               | 0.09      |
| Previous stroke, $n$ (%)                | 35 (11.0)                     | 10 (13.2)               | 0.74      |
| Peripheral artery disease, $n$ (%)      | 66 (20.7)                     | 13 (17.1)               | 0.59      |

|                                                                                   |                   |                   |      |
|-----------------------------------------------------------------------------------|-------------------|-------------------|------|
| Smoker, <i>n</i> (%)                                                              |                   |                   |      |
| Active smoker                                                                     | 55 (17.2)         | 20 (26.3)         | 0.13 |
| Former smoker                                                                     | 65 (20.4)         | 17 (22.4)         |      |
| Never smoked                                                                      | 199 (62.4)        | 39 (51.3)         |      |
| Hypertension, <i>n</i> (%)                                                        | 232 (72.7)        | 52 (68.4)         | 0.54 |
| High cholesterol, <i>n</i> (%)                                                    | 154 (48.3)        | 35 (46.1)         | 0.83 |
| Diabetes, <i>n</i> (%)                                                            | 108 (33.9)        | 23 (30.3)         | 0.64 |
| Positive cardiovascular family history, <i>n</i> (%)                              | 43 (13.5)         | 12 (15.8)         | 0.74 |
| Simplified acute Physiology Score II-score, median [IQR]                          | 68.9 [60.0, 78.0] | 68.9 [62.8, 77.5] | 0.59 |
| Cardiac arrest, <i>n</i> (%)                                                      | 163 (51.1)        | 42 (55.3)         | 0.60 |
| Out of hospital cardiac arrest, <i>n</i> (%)                                      | 90 (28.2)         | 16 (21.1)         | 0.26 |
| Duration of cardio-pulmonary resuscitation if applicable in minutes, median [IQR] | 15.0 [5.0, 31.0]  | 20.0 [2.0, 28.0]  | 0.96 |
| Cause of cardiogenic shock, <i>n</i> (%)                                          |                   |                   |      |
| STEMI                                                                             | 86 (27.0)         | 30 (39.5)         | 0.01 |
| NSTEMI                                                                            | 97 (30.4)         | 29 (38.2)         |      |
| Cardiomyopathy                                                                    | 56 (17.6)         | 13 (17.1)         |      |
| Myocarditis                                                                       | 6 (1.9)           | 2 (2.6)           |      |
| Arrhythmia                                                                        | 34 (10.7)         | 0 (0.0)           |      |
| Valvular                                                                          | 18 (5.6)          | 0 (0.0)           |      |
| Other                                                                             | 21 (6.6)          | 2 (2.6)           |      |

Supplementary Table S2. Medication at ICU discharge

| Medication name           | Conventional<br>( <i>n</i> = 46) | Impella<br>( <i>n</i> = 34) | <i>p</i> value |
|---------------------------|----------------------------------|-----------------------------|----------------|
| ASS, <i>n</i> (%)         | 35 (76.1)                        | 24 (70.6)                   | 0.77           |
| Clopidogrel, <i>n</i> (%) | 18 (39.1)                        | 17 (50.0)                   | 0.46           |
| Prasugrel, <i>n</i> (%)   | 11 (23.9)                        | 7 (20.6)                    | 0.94           |
| Ticagrelor, <i>n</i> (%)  | 1 (2.2)                          | 2 (5.9)                     | 0.79           |
| Betablocker, <i>n</i> (%) | 21 (45.7)                        | 22 (64.7)                   | 0.14           |
| Statin, <i>n</i> (%)      | 30 (65.2)                        | 18 (52.9)                   | 0.38           |
